# Supplementary material for: A hierarchical CoFe-layered double hydroxide modified carbon-felt cathode for heterogeneous electro-Fenton process
Source: Royal Society of Chemistry journal article supplement (doi:10.1039/c6ta09100h), 2016-12-21
Supplement: c6ta09100h1.pdf [file c6ta09100h1.pdf]

**Supporting Information for**

**Hierarchical CoFe-Layered Double Hydroxide Modified Carbon-felt Cathode for  
Heterogeneous Electro-Fenton**

Soliu O. Ganiyu<sup>1</sup>, Thi Xuan Huong Le<sup>2</sup>, Mikhael Bechelany<sup>2,\*</sup>, Giovanni Esposito<sup>3</sup>, Eric D. van Hullebusch<sup>1</sup>, Mehmet A. Oturan<sup>1</sup>, Marc Cretin<sup>2,\*</sup>

<sup>1</sup>*Université Paris-Est, Laboratoire Géomatériaux et Environnement (LGE), EA 4508, UPEM, 77454  
Marne-la-Vallée, France*

<sup>2</sup>*IEM (Institut Européen des Membranes), UMR 5635 (CNRS-ENSCM-UM), Université de  
Montpellier, Place E. Bataillon, F-34095 Montpellier, Cedex 5, France*

<sup>3</sup>*Department of Civil and Mechanical Engineering, University of Cassino and Southern Lazio, Via  
Di Biasio 43, 03043 Cassino (FR), Italy*

\* Corresponding authors: [mikhael.bechelany@umontpellier.fr](mailto:mikhael.bechelany@umontpellier.fr); [marc.cretin@umontpellier.fr](mailto:marc.cretin@umontpellier.fr)

Supplementary Figures

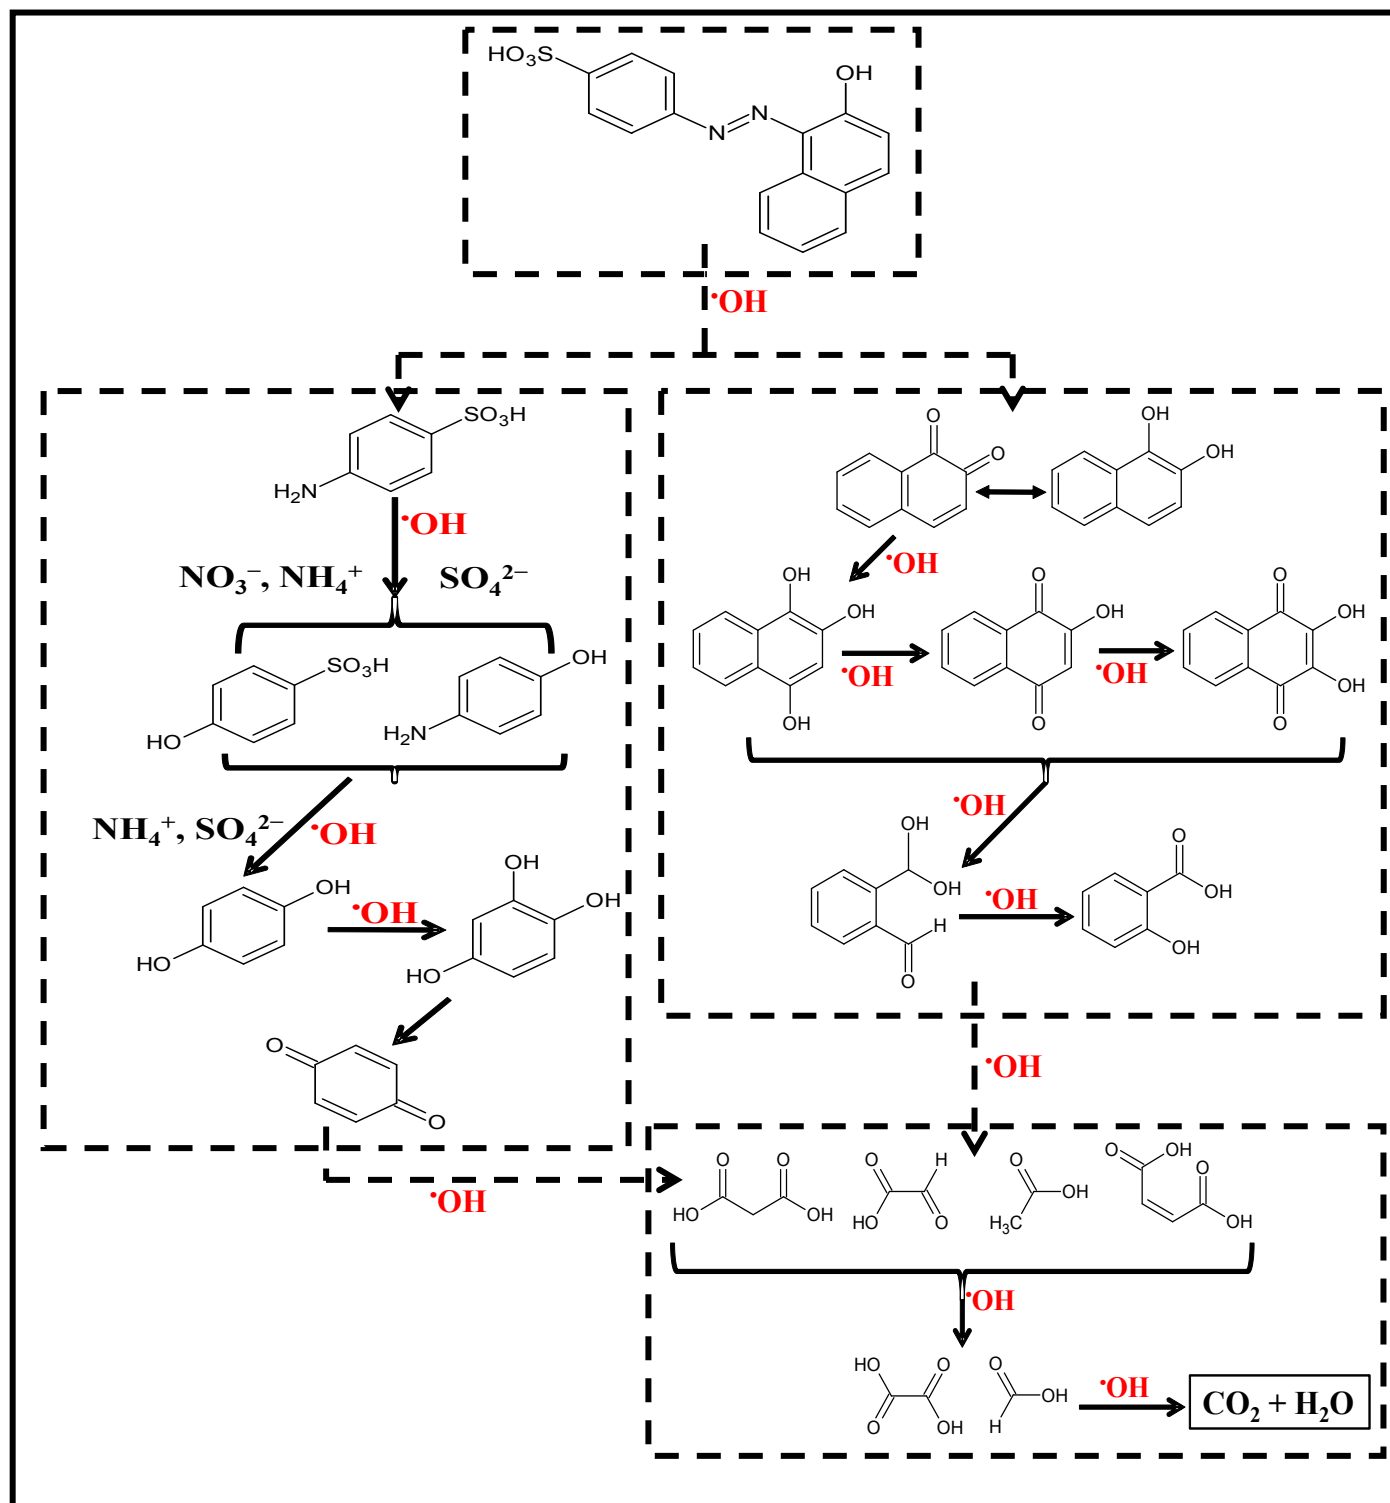

Figure S1. Reaction mechanism for complete degradation of AO7 by  $\cdot\text{OH}$

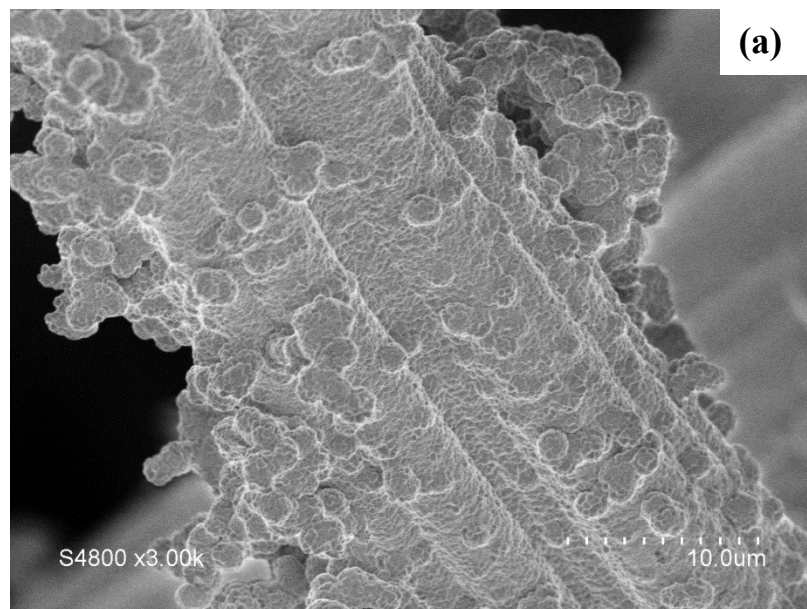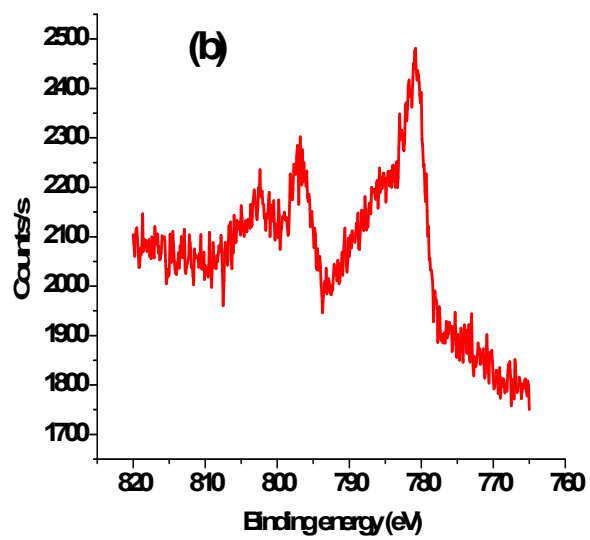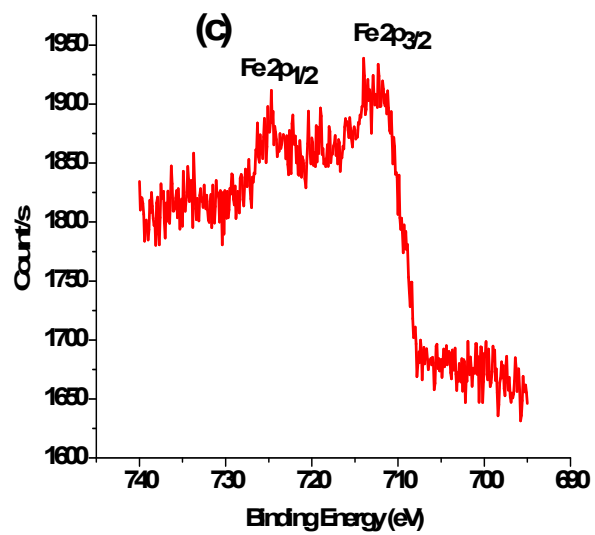

**Figure S2.** (a) SEM image of CoFe-LDH/CF; XPS spectra for (b) Co 2p and (c) Fe 2p of CoFe-LDH/CF after used in EF degradation of AO7 at pH 3 for 8 h.
